# Supplementary material for: Design and synthesis of β-multi-substituted push–pull porphyrins
Source: Royal Society of Chemistry journal article supplement (doi:10.1039/c3ra40308d), 2013-01-01

## Electronic Supplementary Information

### Design and Synthesis of $\beta$ -Multi-Substituted Push-Pull Porphyrins

**Jing Chen,<sup>a</sup> Ke-Lai Li,<sup>b</sup> Yong Guo,<sup>a</sup> Chao Liu,<sup>a</sup> Can-Cheng Guo\*<sup>b</sup> and Qing-Yun Chen\*<sup>a</sup>**

<sup>a</sup> *Key Laboratory of Organofluorine Chemistry, Shanghai Institute of Organic Chemistry, Chinese Academy of Sciences, 345 Lingling Road, Shanghai 200032, P. R. of China. Fax (+86) 21-64166128; Tel: (+86) 021-54925196 E-mail: chenqy@sioc.ac.cn*

<sup>b</sup> *College of Chemistry and Chemical Engineering, Hunan University, Changsha 410082, P. R. of China*

- 1. General Procedures** (S2)
- 2. Experimental Procedures** (S3-S5)
- 3. Figure S1** <sup>1</sup>H NMR of porphyrin **1** and **3** at 25 °C, 0 °C, -33 °C, and -60 °C (S6-S8)
- 4. Figure S2.** UV/Vis absorption spectra of the porphyrins **TPP**, **1**, **2** and **3** measured in dichloromethane. (S8)
- 5. Figure S3** Cyclic voltammograms of porphyrins **1**, **2** and **3** in CH<sub>2</sub>Cl<sub>2</sub> with 0.1 M Bu<sub>4</sub>NPF<sub>6</sub> at 25 °C (S9-S11)
- 6.** Spectral data for target compounds **1**, **2** and **3** (S12-S16)
- 7.** Geometry for target compounds **1**, **2** and **3** by using the density functional theory (DFT) with the B3LYP/6-31G(d) basic set implemented in the Gaussian 09 program package (S17-S19)

## 1. General Procedures

$^1\text{H}$  NMR spectra were recorded on Varian 300MHz or 400MHz spectrometers with TMS as an internal standard (negative for upfield).  $^{19}\text{F}$  NMR spectra were recorded on a Varian 300MHz spectrometer. MALDI-MS and MALDI-HRMS were recorded on a Bruker APEX<sub>III</sub> FTICRMS mass spectrometer. UV-vis spectra were recorded on a Varian Cary 100 spectrometer. Elemental analyses were obtained on a Perkin-Elmer 2400 Series II Elemental Analyzer. Cyclic voltammetry measurements were carried out in a 0.1 M  $\text{Bu}_4\text{NPF}_6$  solution in  $\text{CH}_2\text{Cl}_2$  at room temperature using a scan rate of  $100 \text{ mV s}^{-1}$  under nitrogen on a CHI610D Instrument, with a platinum-carbon working electrode, a saturated calomel electrode, and a platinum wire as the auxiliary electrode. Column chromatography was performed using silica gel (mesh 300-400).

## 2. Experimental Procedures

### Preparation of 7,8-dibromo-17,18-dihydroxy-5,10,15,20-tetraphenylchlorin (6)

7,8-dihydroxy-5,10,15,20-tetraphenylchlorin (**5**) (100 mg, 0.15 mmol), NBS (61 mg, 0.31 mmol) was added to a 100 mL flask. The flask was then evacuated and backfilled with nitrogen (three cycles). CH<sub>2</sub>Cl<sub>2</sub> (20 mL) was added with a syringe. The resulting solution was stirred for 4 hours in an ice-water bath under nitrogen. Et<sub>3</sub>N (1 mL) was added and then quickly filtered through a short silica plug (300-400 mesh, eluting with CH<sub>2</sub>Cl<sub>2</sub>). The filtrate was purified by flash chromatography (silica gel, 300-400 mesh, PE-CH<sub>2</sub>Cl<sub>2</sub> as eluent) to yield products **6** (118 mg, 95% yield). <sup>1</sup>H NMR (300 MHz, CDCl<sub>3</sub>, TMS) δ 8.57 (d, *J* = 4.7 Hz, 2 H, β-H), 8.22 (d, *J* = 4.7 Hz, 2 H, β-H), 8.19-7.65 (m, 20 H, Ph-H), 6.35 (s, 2 H, β-H, OH), 3.02 (s, 2 H), -1.72 (s, 2 H, NH); UV-vis (CH<sub>2</sub>Cl<sub>2</sub>) λ<sub>max</sub> (relative intensity) 408(0.84), 516(0.07), 545(0.07), 592 (0.03), 644(0.13) nm; HRMS (MALDI) calc'd for C<sub>44</sub>H<sub>31</sub>N<sub>4</sub>O<sub>2</sub>Br<sub>2</sub> [M+H]<sup>+</sup> 805.0809, found 805.0808.

### Preparation of 7,8-dibromo-17,18-dimethoxy-5,10,15,20-tetraphenylchlorin (7)

**6** (95 mg, 0.12 mmol) was added to a 100 mL flask. The flask was then evacuated and backfilled with nitrogen (three cycles). THF (20 mL) was added with a syringe. NaH (35 mg, 1.2 mmol) was added in several portions. The reaction mixture was stirred for 30 min. Then 183 μL CH<sub>3</sub>I was added with a syringe. The resulting solution continued to be stirred for 3h. The reaction was quenched with water, and the aqueous layer was extracted with CH<sub>2</sub>Cl<sub>2</sub> (3 x 20 mL). The combined organic layers were quickly filtered through a short silica plug (300-400 mesh, eluting with CH<sub>2</sub>Cl<sub>2</sub>). The filtrate was purified by flash chromatography (silica gel, 300-400 mesh, PE-CH<sub>2</sub>Cl<sub>2</sub> as eluent) to yield the products **7** (87 mg, 88% yield) <sup>1</sup>H NMR (300 MHz, CDCl<sub>3</sub>, TMS) δ 8.56 (d, *J* = 5.7 Hz, 2 H, β-H), 8.19 -7.61 (m, 22 H, β-,Ph-H), 6.00 (s, 2 H, β-H, OH), 2.98 (s, 6 H, OCH<sub>3</sub>), -1.81 (s, 2 H, NH); UV-vis (CH<sub>2</sub>Cl<sub>2</sub>) λ<sub>max</sub>(ε) 426 (8.7×10<sup>4</sup>), 528 (9.4×10<sup>3</sup>), 594 (6.9×10<sup>3</sup>), 644 (7.2×10<sup>3</sup>) nm; HRMS (MALDI) calc'd for C<sub>46</sub>H<sub>35</sub>Br<sub>2</sub>N<sub>4</sub>O<sub>2</sub> [M+H]<sup>+</sup> 833.1097, found 833.1121.

### Preparation of 7,8-dibromo-17,18-dimethoxy-5,10,15,20-tetraphenylporphyrin (1)

**7** (28 mg, 0.12 mmol), DDQ (30 mg, 0.13 mmol), and 10 ml CHCl<sub>3</sub> was added to a 50 mL flask. The resulting solution was stirred and heated under reflux for 10 h. The reaction mixture was quickly filtered through a short silica plug (300-400 mesh, eluting with CH<sub>2</sub>Cl<sub>2</sub>). The filtrate was purified by flash chromatography (silica gel, 300-400 mesh, PE-CH<sub>2</sub>Cl<sub>2</sub> as eluent) to yield the products **1** (28 mg, 92% yield). <sup>1</sup>H NMR (300 MHz, CDCl<sub>3</sub>, TMS) δ 8.78 (d, *J* = 4.6 Hz, 2 H, β-H), 8.63 (d, *J* = 4.6 Hz, 2 H, β-H), 8.18 (d, *J* = 6.4 Hz, 8 H, *o*-Ph-H), 7.80-7.75 (m, 12 H, *m,p*-Ph-H), 3.76 (s, 6 H, OCH<sub>3</sub>), -2.97 (s, 2 H, NH). UV-vis (CH<sub>2</sub>Cl<sub>2</sub>) λ<sub>max</sub> (ε) 425 (6.8×10<sup>5</sup>), 524 (7.0×10<sup>4</sup>), 596 (3.3×10<sup>4</sup>), 663 (3.3×10<sup>4</sup>) nm; HRMS (MALDI) calc'd for C<sub>46</sub>H<sub>33</sub>Br<sub>2</sub>N<sub>4</sub>O<sub>2</sub> [M+H]<sup>+</sup> 831.0967, found 831.0965.

### Preparation of Nickel (II) 7,8-dibromo-17,18-dimethoxy-5,10,15,20-tetraphenylporphyrin (8)

yield 100%.  $^1\text{H}$  NMR (400 MHz,  $\text{CDCl}_3$ , TMS)  $\delta$  8.65 (d,  $J$  = 5.1 Hz, 2 H,  $\beta$ -H), 8.53 (d,  $J$  = 5.0 Hz, 2 H,  $\beta$ -H), 7.90-7.84 (m, 8 H, *o*-Ph-H), 7.65-7.62 (m, 12 H, *m,p*-Ph-H), 3.71 (s, 6 H,  $\text{OCH}_3$ ); HRMS (MALDI) calc'd for  $\text{C}_{46}\text{H}_{30}\text{Br}_2\text{N}_4\text{O}_2\text{Ni}$   $[\text{M}]^+$  886.0079, found 886.0084.

**Preparation of Copper(II) 7,8-dibromo-17,18-dimethoxy-5,10,15,20-tetraphenylporphyrin (9)**

**1** (37 mg, 0.044 mmol), copper acetate tetrahydrate (5 mg, 0.44 mmol), and 10 ml DMF was added to a 50 mL flask. The resulting solution was stirred and heated under reflux for 1 h. To the cooled reaction mixture,  $\text{CH}_2\text{Cl}_2$  (20 mL) and  $\text{H}_2\text{O}$  (20 mL) were added. The organic layer was washed with water and then quickly filtered through a short silica plug (300-400 mesh, eluting with  $\text{CH}_2\text{Cl}_2$ ). The filtrate was concentrate to give the products **9** (39 mg, 100% yield). UV-vis ( $\text{CH}_2\text{Cl}_2$ ):  $\lambda_{\text{max}}$  ( $\epsilon$ ) 421 ( $1.4 \times 10^5$ ), 522 ( $4.8 \times 10^3$ ), 545 ( $1.1 \times 10^4$ ), 594 ( $3.4 \times 10^3$ ), 662 ( $2.6 \times 10^3$ ) nm. HRMS (MALDI) calc'd for  $\text{C}_{46}\text{H}_{30}\text{N}_4\text{O}_2\text{Br}_2\text{Cu}$   $[\text{M}]^+$  891.0032, found 891.0026.

**Preparation of Copper(II) 7,8-dimethoxy-17,18-ditrifluoromethyl-5,10,15,20-tetraphenylporphyrin (10)**

**9** (22 mg, 0.025 mmol),  $\text{Pd}_2(\text{dba})_3$  (2 mg, 0.002 mmol), and  $\text{CuI}$  (47 mg, 0.25 mmol) was added to a 50 mL flask. The flask was then evacuated and backfilled with nitrogen (three cycles). DMF (20 mL) and  $\text{FSO}_2\text{CF}_2\text{COOMe}$  (31  $\mu\text{l}$ , 0.25 mmol) were added with a syringe. The resulting solution was stirred and heated under 100  $^\circ\text{C}$  for 10 h. To the cooled reaction mixture,  $\text{CH}_2\text{Cl}_2$  (40 mL) and  $\text{H}_2\text{O}$  (40 mL) were added. The organic layer was washed with water and then quickly filtered through a short silica plug (300-400 mesh, eluting with  $\text{CH}_2\text{Cl}_2$ ). The filtrate was purified by flash chromatography (silica gel, 300-400 mesh, PE-  $\text{CH}_2\text{Cl}_2$  as eluent) to yield the products **10** (21 mg, 98% yield). HRMS (MALDI) calc'd for  $\text{C}_{48}\text{H}_{30}\text{N}_4\text{O}_2\text{F}_2\text{Cu}$   $[\text{M}]^+$  871.1554, found 871.1564.

**Preparation of 7,8-dimethoxy-17,18-ditrifluoromethyl-5,10,15,20-tetraphenylporphyrin (2)**

**10** (21 mg, 0.024 mmol) and  $\text{CH}_2\text{Cl}_2$  (10 mL) was added to a 50 mL flask. Then the admixed acids ( $\text{H}_2\text{SO}_4:\text{CF}_3\text{COOH}$  = 4:1, 2 mL) was slowly added in the solution. The reaction was monitored by TLC. The reaction was quenched with water when **10** disappeared. The aqueous layer was extracted with  $\text{CH}_2\text{Cl}_2$ . The organic layer was washed with water and then quickly filtered through a short silica plug (300-400 mesh, eluting with  $\text{CH}_2\text{Cl}_2$ ). The filtrate was purified by flash chromatography (silica gel, 300-400 mesh, PE- $\text{CH}_2\text{Cl}_2$  as eluent) to yield the products **2** (10 mg, 51% yield).  $^1\text{H}$  NMR (300 MHz,  $\text{CDCl}_3$ , TMS)  $\delta$  8.61 (d,  $J$  = 4.6 Hz, 2 H,  $\beta$ -H), 8.32 (d,  $J$  = 4.6 Hz, 2 H,  $\beta$ -H), 8.22 (d,  $J$  = 6.8 Hz, 4 H, *o*-Ph-H), 8.15 (d,  $J$  = 6.9 Hz, 4 H, *o*-Ph-H), 7.77-7.69 (m, 12 H, *m,p*-Ph-H), 3.67 (s, 6 H,  $\text{OCH}_3$ ), -1.44 (s, 2 H, NH);  $^{19}\text{F}$  NMR (282 MHz,  $\text{CDCl}_3$ )  $\delta$  -48.9 (s, 6 F,  $\text{CF}_3$ ); UV-vis ( $\text{CH}_2\text{Cl}_2$ ):  $\lambda_{\text{max}}$  ( $\epsilon$ ) 446 ( $3.4 \times 10^5$ ), 551 ( $3.5 \times 10^4$ ), 718 ( $4.1 \times 10^4$ ) nm; HRMS (MALDI) calc'd for  $\text{C}_{48}\text{H}_{33}\text{N}_4\text{O}_2\text{F}_6[\text{M}+\text{H}]^+$  811.2502, found 811.2525.

**Preparation of Nickel (II) 7,8-dimethoxy-17-(4'-chlorooctofluorobutyl)-5,10,15,20-tetraphenylporphyrin (11)**

**8** (50 mg, 0.056 mmol), Pd<sub>2</sub>(dba)<sub>3</sub> (5 mg, 0.005 mmol), and Cu (71 mg, 1.125 mmol) was added to a 50 mL flask. The flask was then evacuated and backfilled with nitrogen (three cycles). DMF (20 mL) and ClF<sub>8</sub>C<sub>4</sub>I (203 mg, 0.56 mmol) were added with a syringe. The resulting solution was stirred and heated under 100 °C for 0.5 h. To the cooled reaction mixture, CH<sub>2</sub>Cl<sub>2</sub> (40 mL) and H<sub>2</sub>O (40 mL) were added. The organic layer was washed with water and then quickly filtered through a short silica plug (300-400 mesh, eluting with CH<sub>2</sub>Cl<sub>2</sub>). The filtrate was purified by flash chromatography (silica gel, 300-400 mesh, PE-CH<sub>2</sub>Cl<sub>2</sub> as eluent) to yield the products **11** (40 mg, 74 % yield). <sup>1</sup>H NMR (300 MHz, CDCl<sub>3</sub>, TMS) δ 9.02 (s, 1 H, β-H), 8.66-8.58 (m, 3 H, β-H), 8.49 (d, 1 H, β-H), 8.06-7.53 (m, 20 H, Ph-H), 3.75 (s, 3 H, OCH<sub>3</sub>), 3.70 (s, 3 H, OCH<sub>3</sub>); <sup>19</sup>F NMR (282 MHz, CDCl<sub>3</sub>) δ -68.3 (m, 2 F, CF<sub>2</sub>Cl), -97.5 (m, 2 F), -117.3 (m, 2 F), -119.5 (m, 2 F); HRMS (MALDI) calc'd for C<sub>50</sub>H<sub>31</sub>N<sub>4</sub>O<sub>2</sub>F<sub>8</sub>ClNi [M]<sup>+</sup> 964.1344, found 964.1356.

**Preparation of Nickel ( II ) 7,8-dimethoxy-17,18-tetrafluorobenzo-5,10,15,20-tetraphenylporphyrin (12)**

**11** (90 mg, 0.093mmol), Na<sub>2</sub>S<sub>2</sub>O<sub>4</sub> (162 mg, 0.93 mmol), and K<sub>2</sub>CO<sub>3</sub> (129 mg, 0.93 mmol) was added to a 50 mL flask. The flask was then evacuated and backfilled with nitrogen (three cycles). DMF (15 mL) was added with a syringe. The resulting solution was stirred and heated under 100 °C for 2 h. To the cooled reaction mixture, CH<sub>2</sub>Cl<sub>2</sub> (30 mL) and H<sub>2</sub>O (30 mL) were added. The organic layer was washed with water and then quickly filtered through a short silica plug (300-400 mesh, eluting with CH<sub>2</sub>Cl<sub>2</sub>). The filtrate was purified by flash chromatography (silica gel, 300-400 mesh, PE-CH<sub>2</sub>Cl<sub>2</sub> as eluent) to yield the products **12** (67 mg, 85% yield). <sup>1</sup>H NMR (300 MHz, CDCl<sub>3</sub>, TMS) δ 8.52 (d, *J* = 5.2 Hz, 2 H, β-H), 8.38 (d, *J* = 5.2 Hz, 2 H, β-H), 8.08-7.97 (m, 8 H, *o*-Ph-H), 7.75-7.63 (m, 12 H, *m,p*-Ph-H), 3.64 (s, 6 H, OCH<sub>3</sub>); <sup>19</sup>F NMR (282 MHz, CDCl<sub>3</sub>) δ -131.3 (m, 2 F), -157.7 (m, 2 F); HRMS (MALDI) calc'd for C<sub>50</sub>H<sub>30</sub>N<sub>4</sub>O<sub>2</sub>F<sub>4</sub>Ni [M]<sup>+</sup> 852.1640, found 852.1653.

**Preparation of 7,8-dimethoxy-17,18-tetrafluorobenzo-5,10,15,20-tetraphenylporphyrin (3)**

**12** (40 mg, 0.047 mmol) was dissolved in a 50 mL flask. A mixture of H<sub>2</sub>SO<sub>4</sub> and CF<sub>3</sub>COOH (2 mL, 4:1) was dropped into the flask slowly. The product was obtained in 40% yield (15 mg). <sup>1</sup>H NMR (300 MHz, CDCl<sub>3</sub>, TMS) δ 8.73 (d, *J* = 4.8 Hz, 2 H, β-H), 8.51 (d, *J* = 4.8 Hz, 2 H, β-H), 8.35-8.23 (m, 8 H, *o*-Ph-H), 7.81-7.74 (m, 12 H, *m,p*-Ph-H), 3.70 (s, 6 H, OCH<sub>3</sub>), -2.45 (s, 2 H, NH); <sup>19</sup>F NMR (282 MHz, CDCl<sub>3</sub>) δ -132.2 (m, 2 F), -157.3 (m, 2 F); UV-vis (CH<sub>2</sub>Cl<sub>2</sub>): λ<sub>max</sub> (ε) 431 (1.8×10<sup>5</sup>), 527 (1.3×10<sup>4</sup>), 561 (3.1×10<sup>3</sup>), 607 (3.1×10<sup>3</sup>), 669 (4.8×10<sup>3</sup>) nm; HRMS (MALDI) calc'd for C<sub>50</sub>H<sub>33</sub>N<sub>4</sub>O<sub>2</sub>F<sub>4</sub> [M+H]<sup>+</sup> 797.2517, found 797.2534.

**3. Figure S1**  $^1\text{H}$  NMR of porphyrin **1** and **3** at 0 °C, -33 °C, and -60 °C.

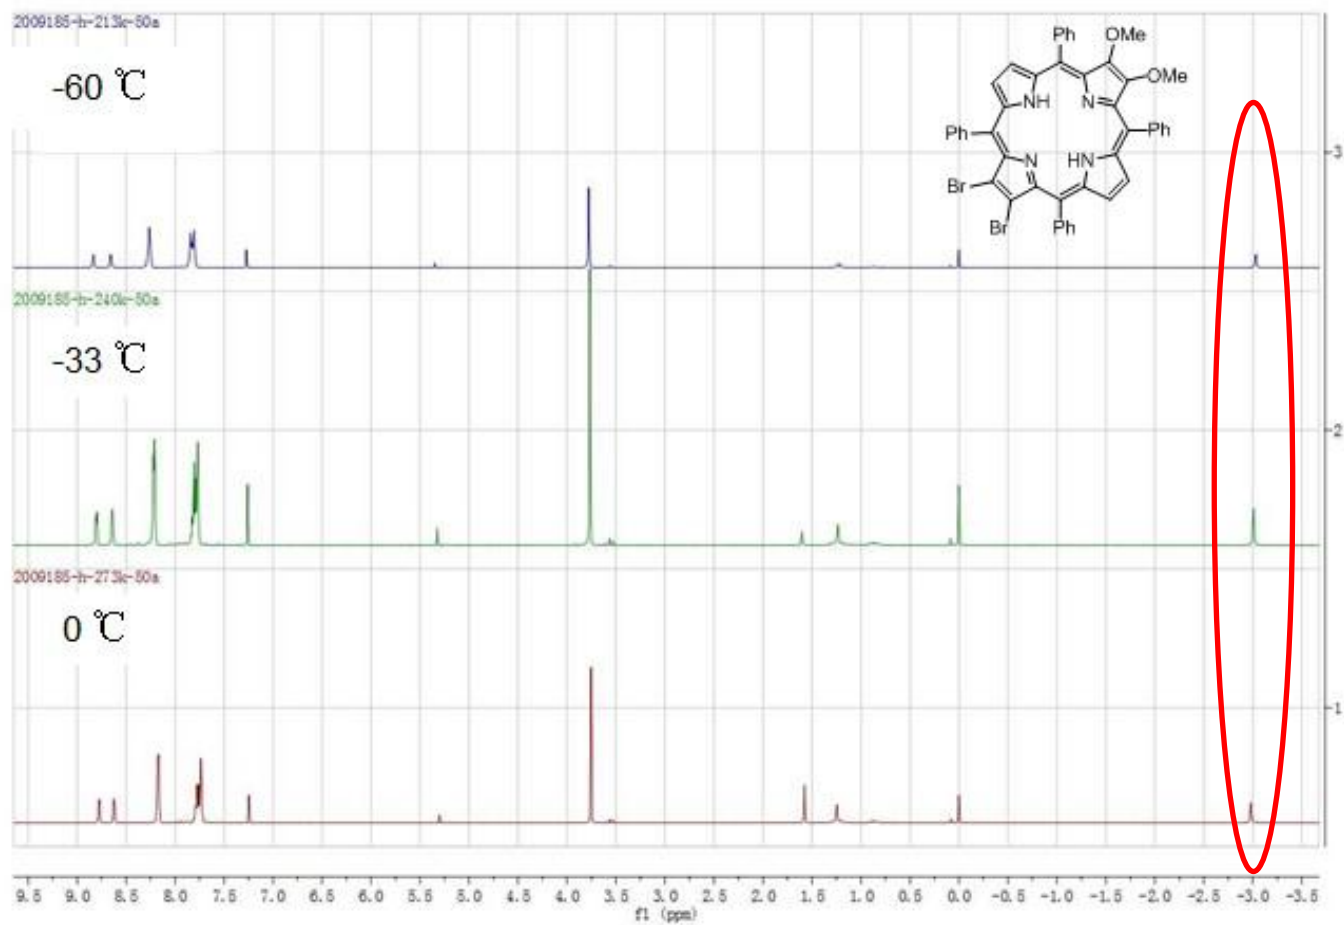

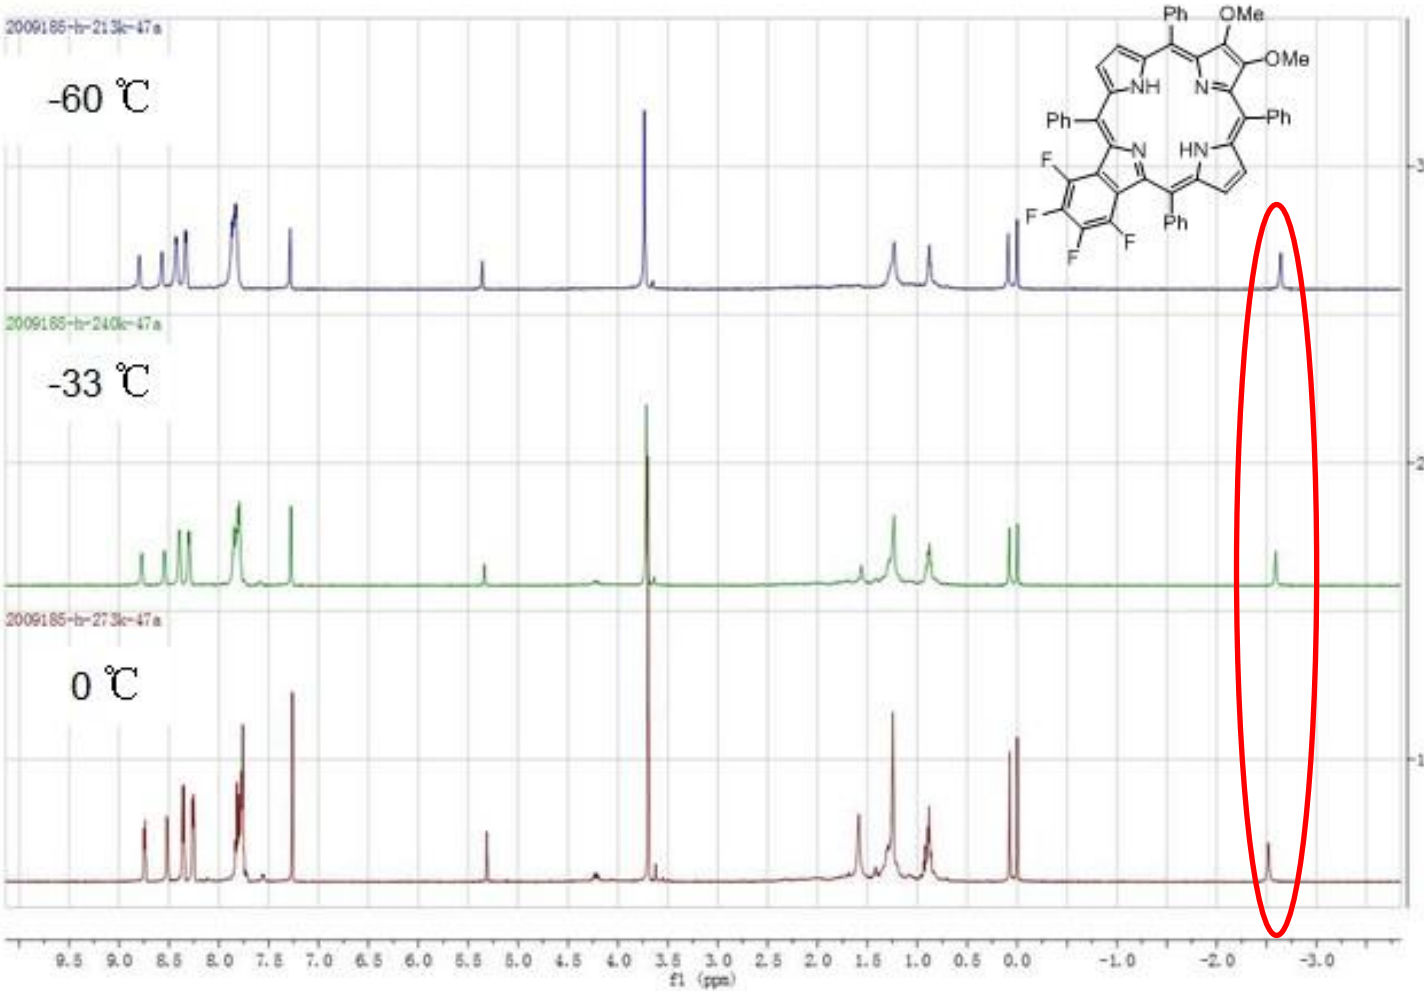

4. **Figure S2.** UV/Vis absorption spectra of the porphyrins **TPP**, **1**, **2** and **3** measured in dichloromethane.

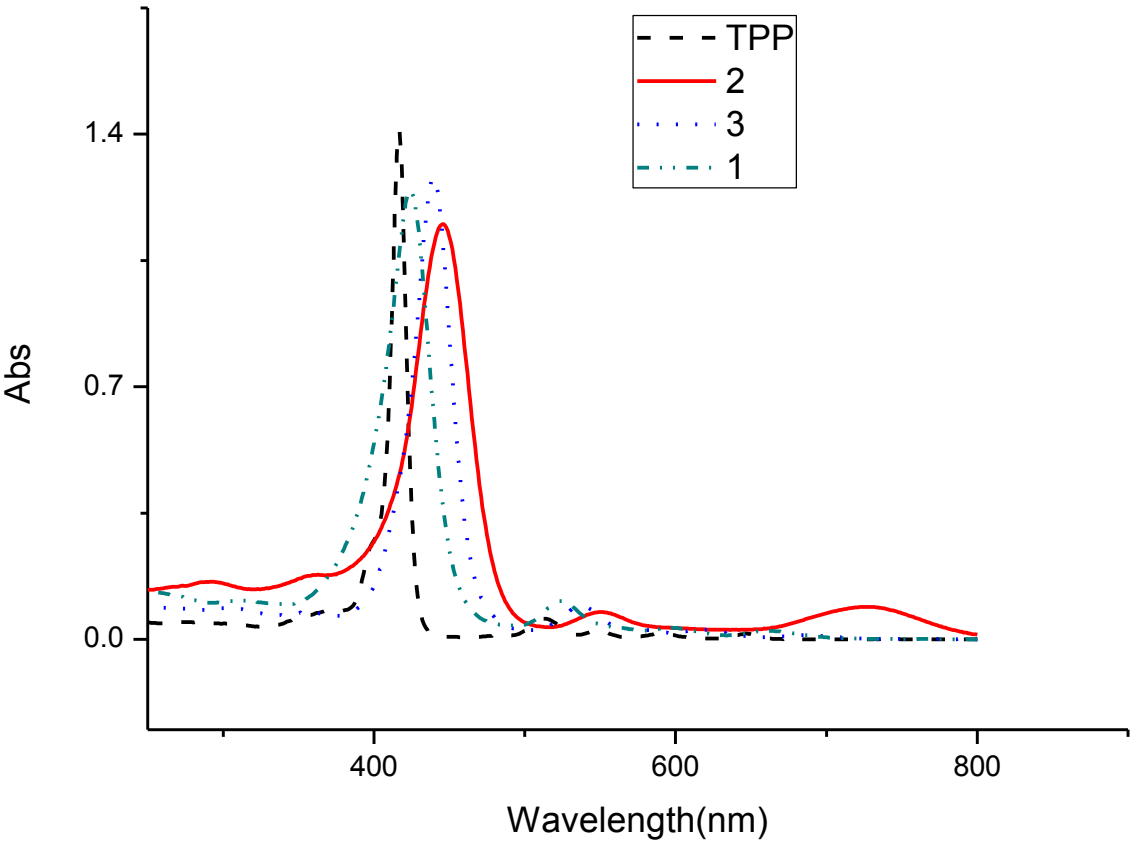

**5. Figure S3** Cyclic voltammograms of porphyrins **1**, **2** and **3** in CH<sub>2</sub>Cl<sub>2</sub> with 0.1 M Bu<sub>4</sub>NPF<sub>6</sub> at 25 °C

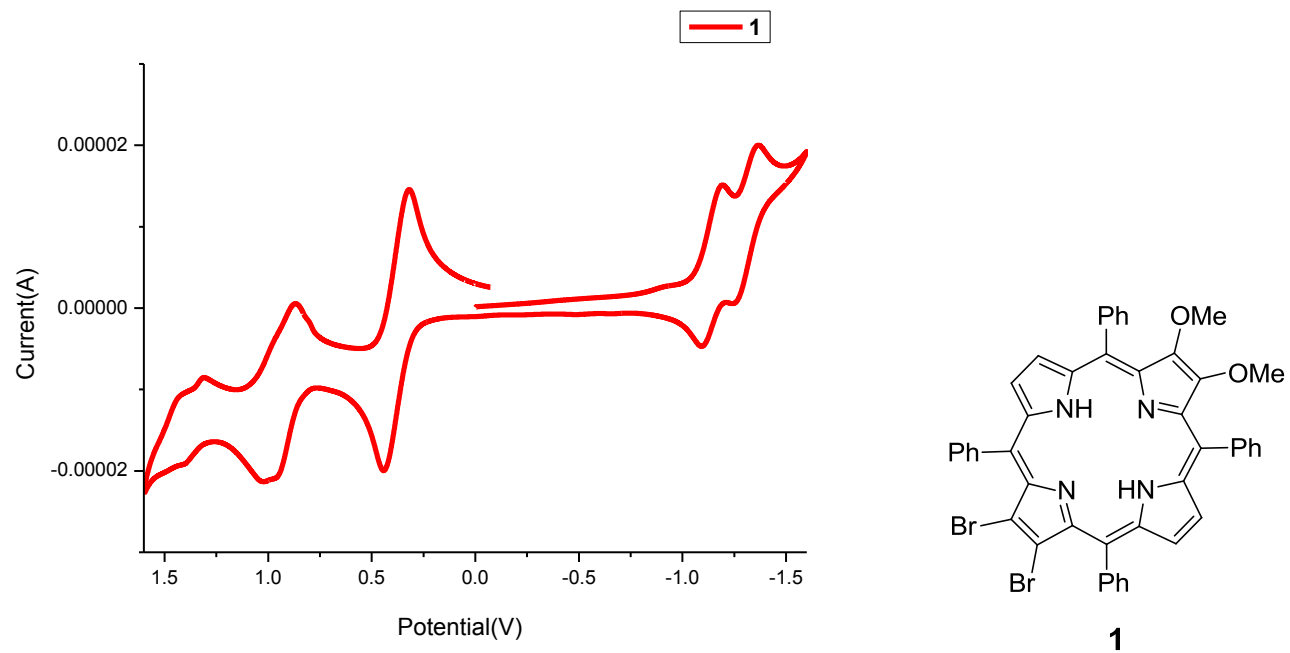

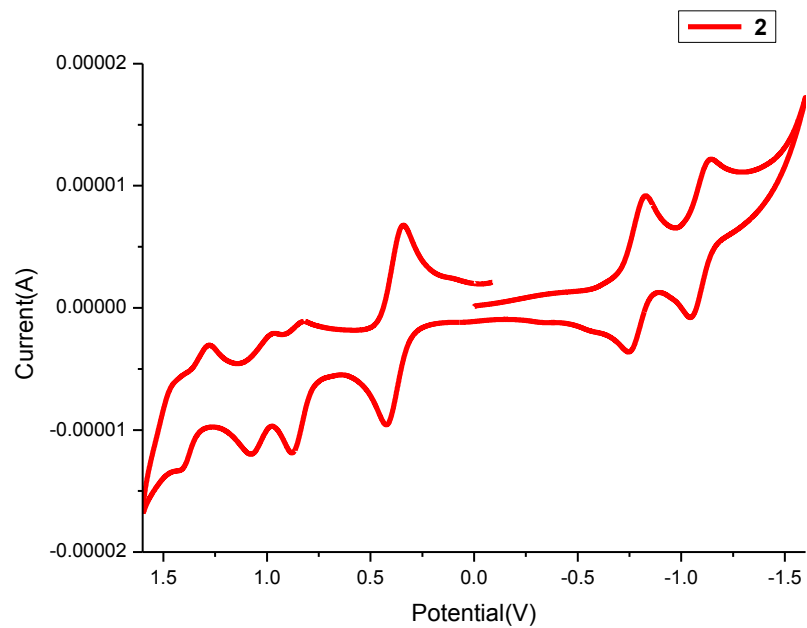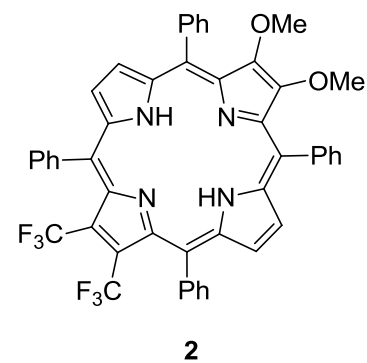

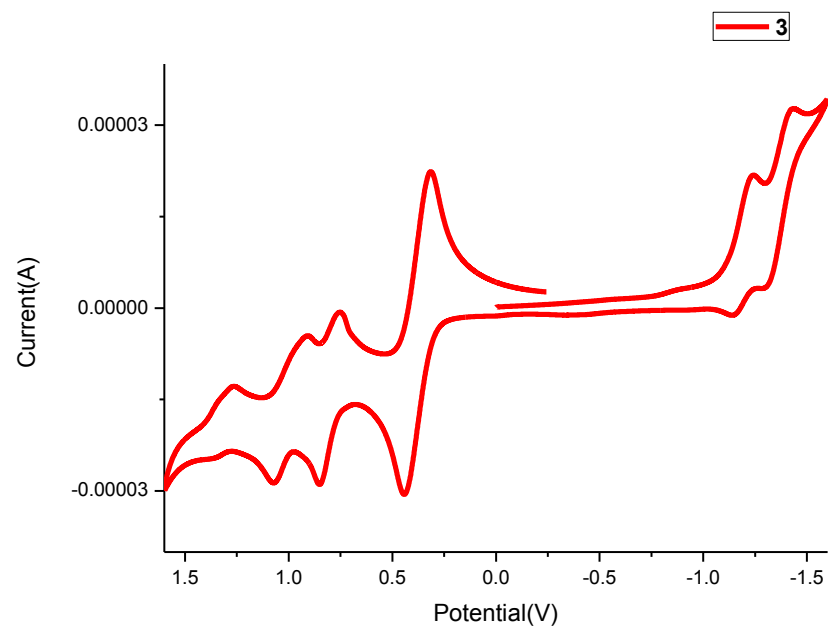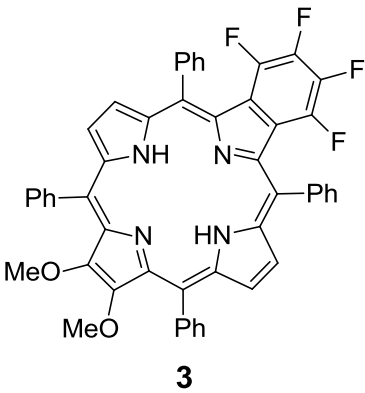

6. NMR spectra for target compounds **1**, **2** and **3**

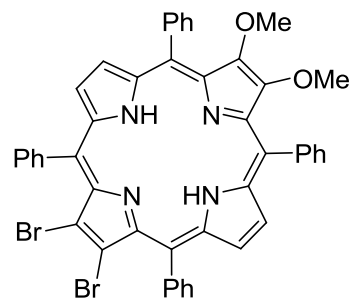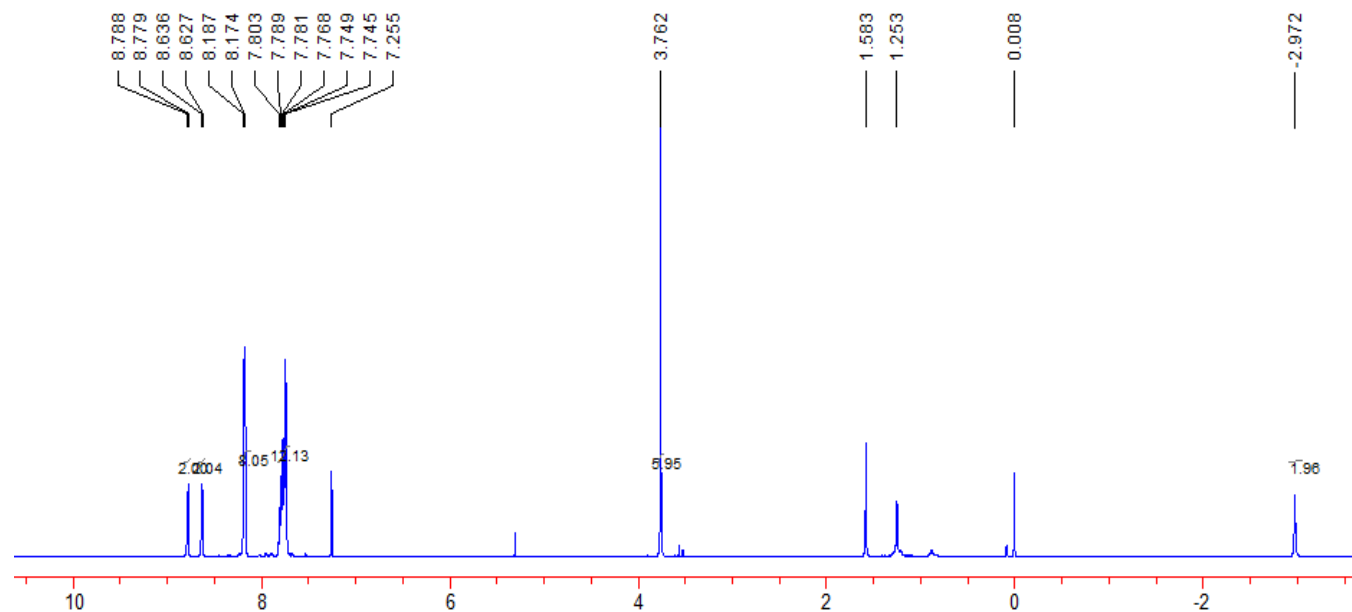

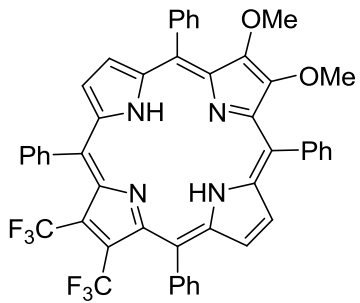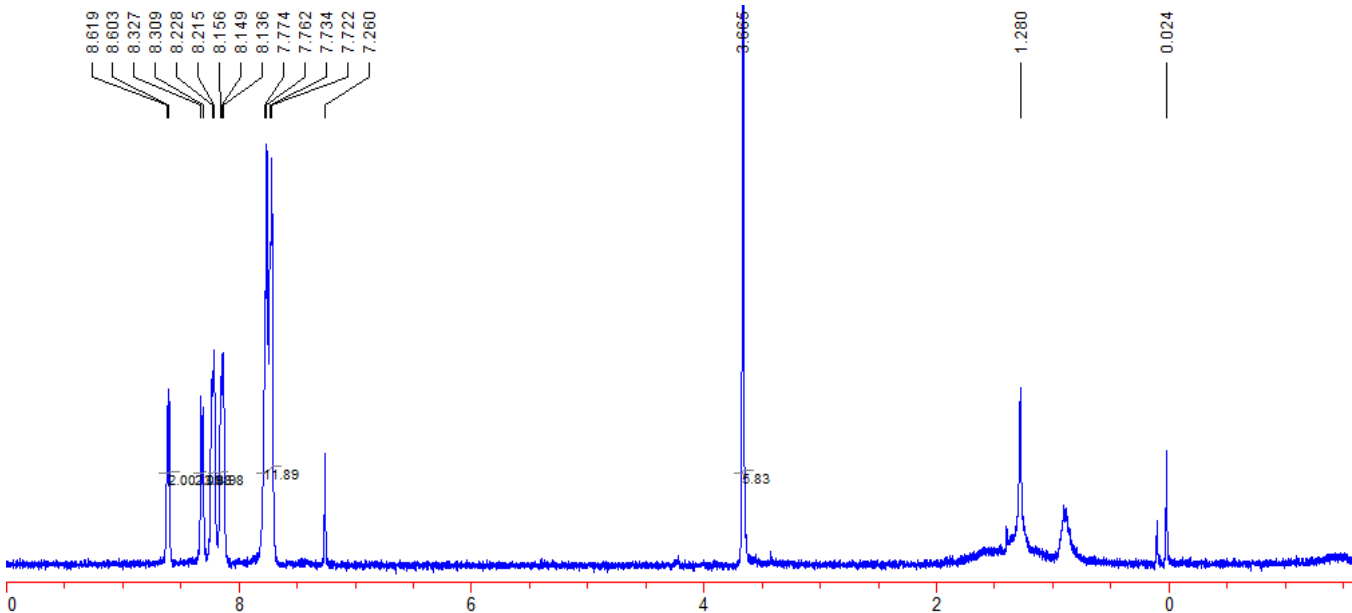

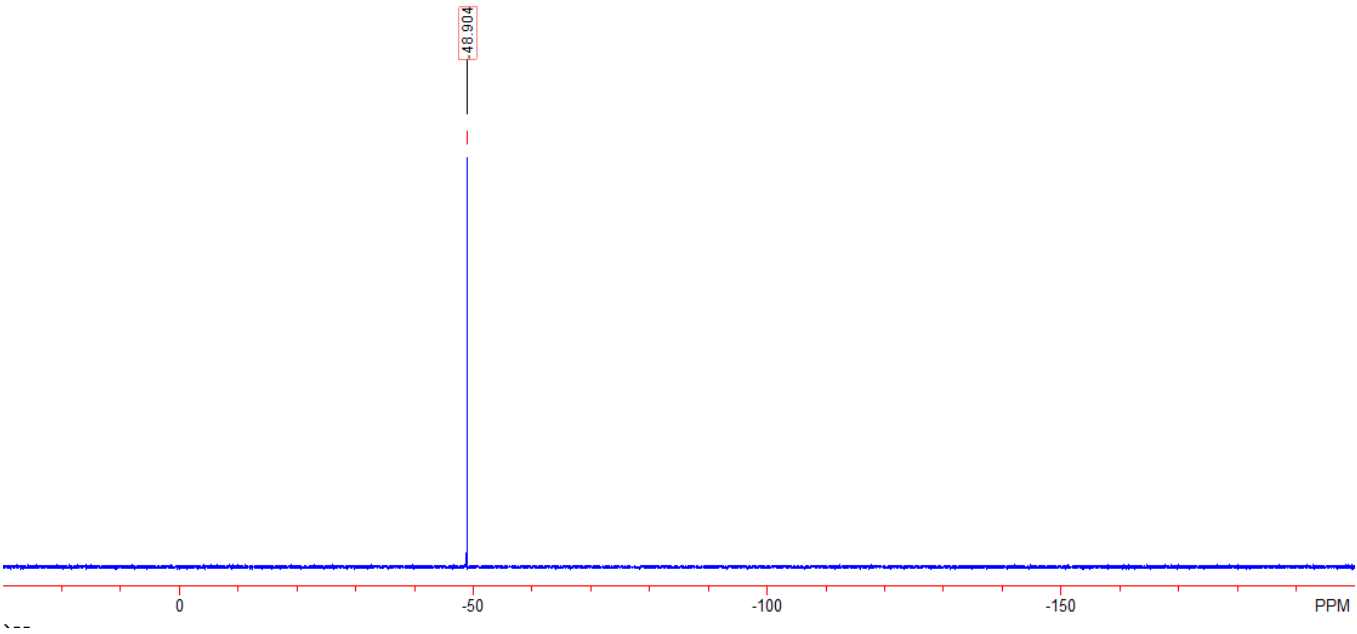

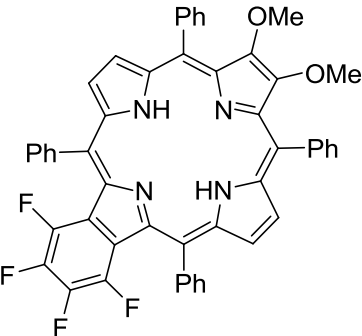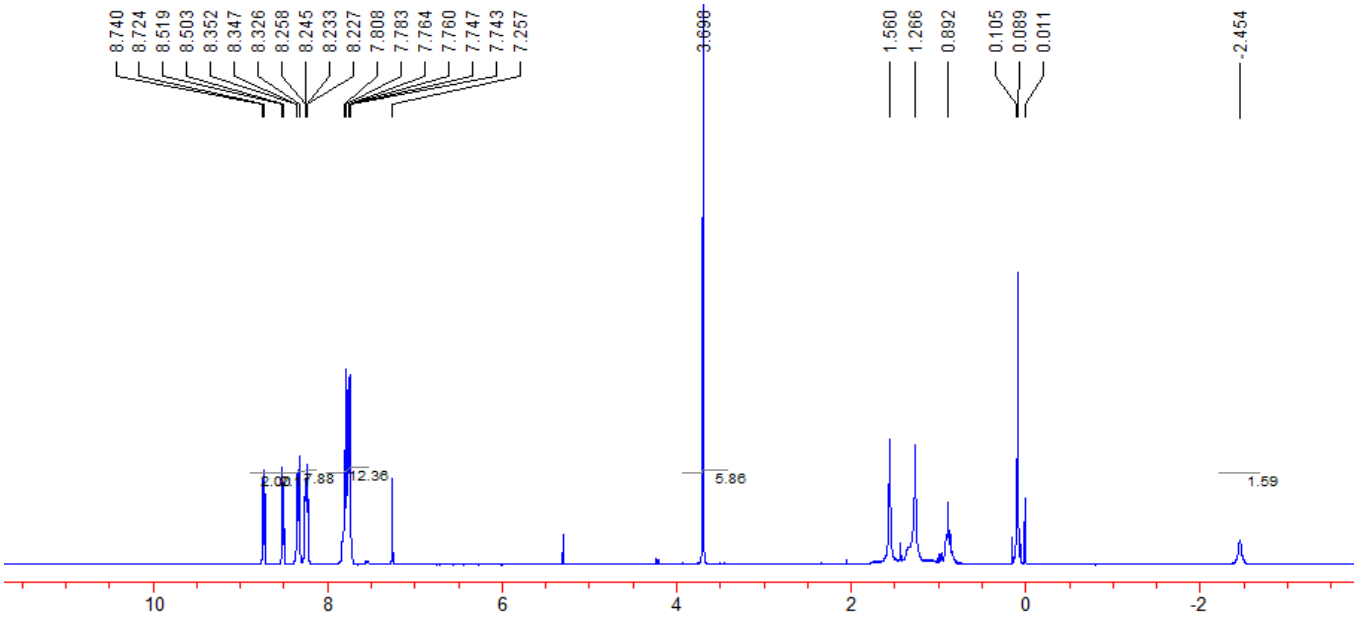

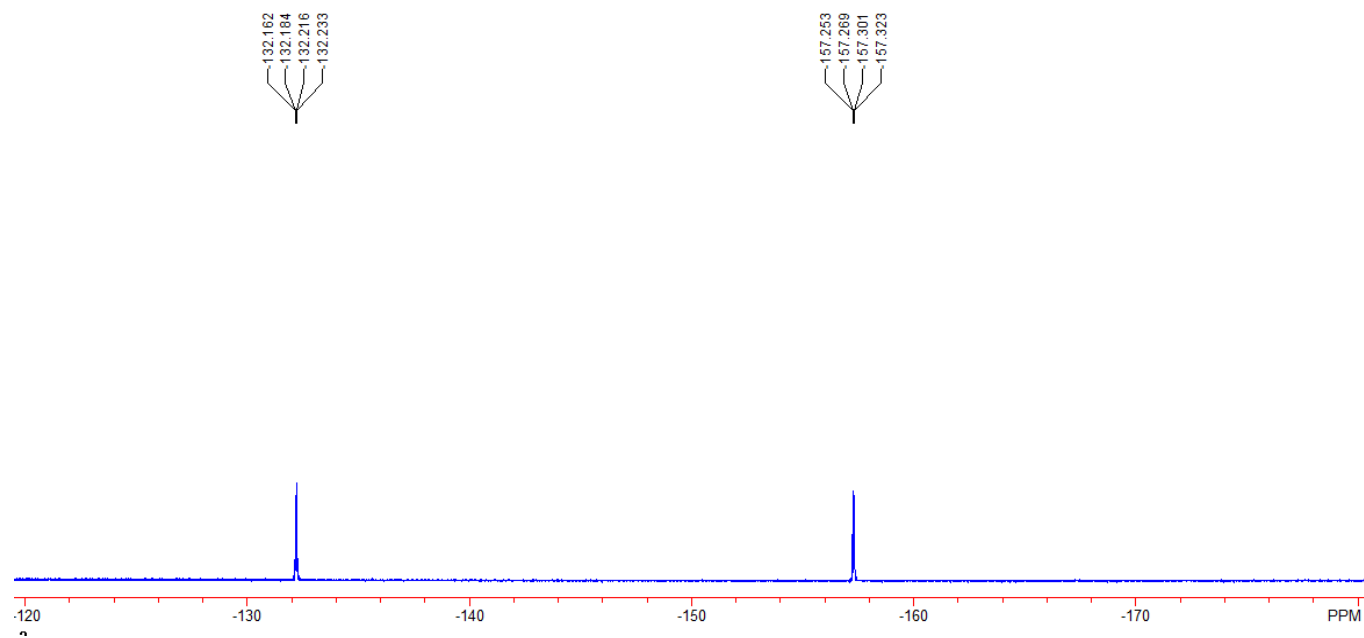

**7.** Geometry for target compounds **1**, **2** and **3** by using the density functional theory (DFT) with the B3LYP/6-31G(d) basic set implemented in the Gaussian 09 program package

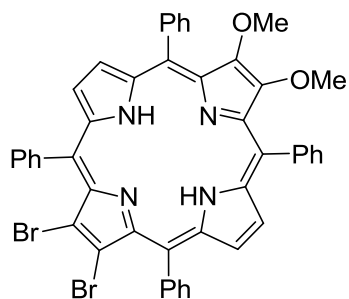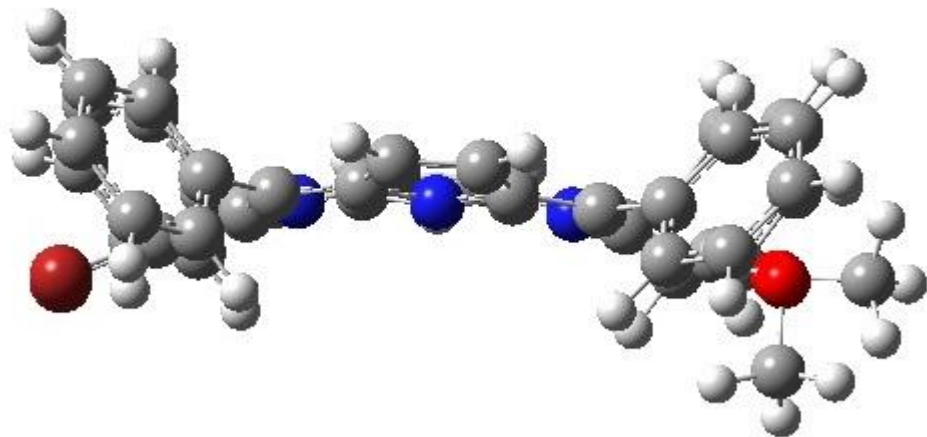

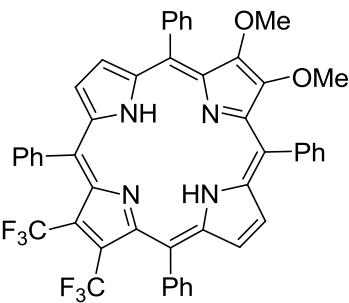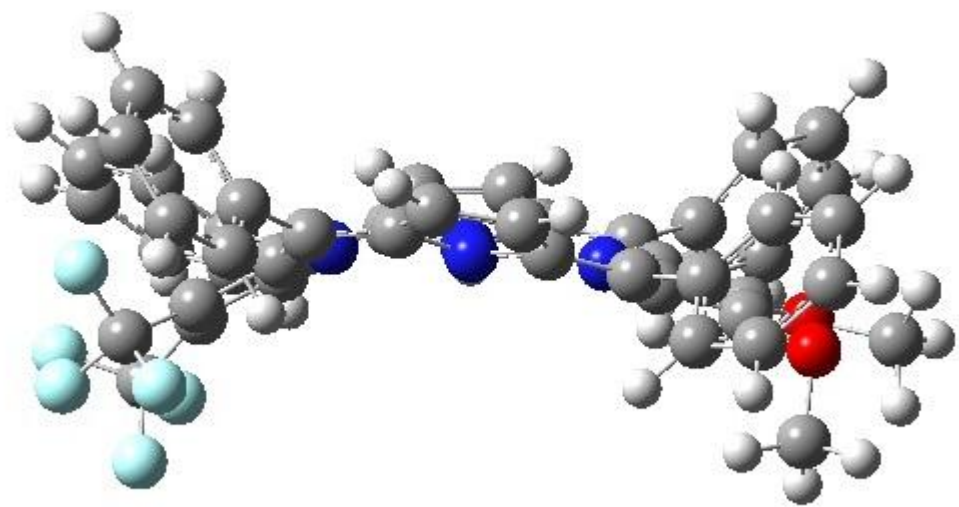

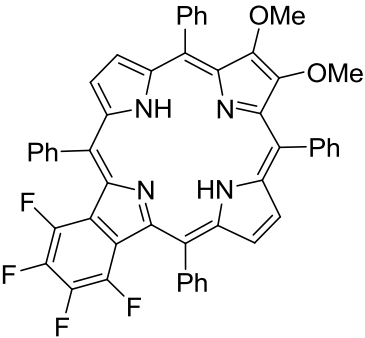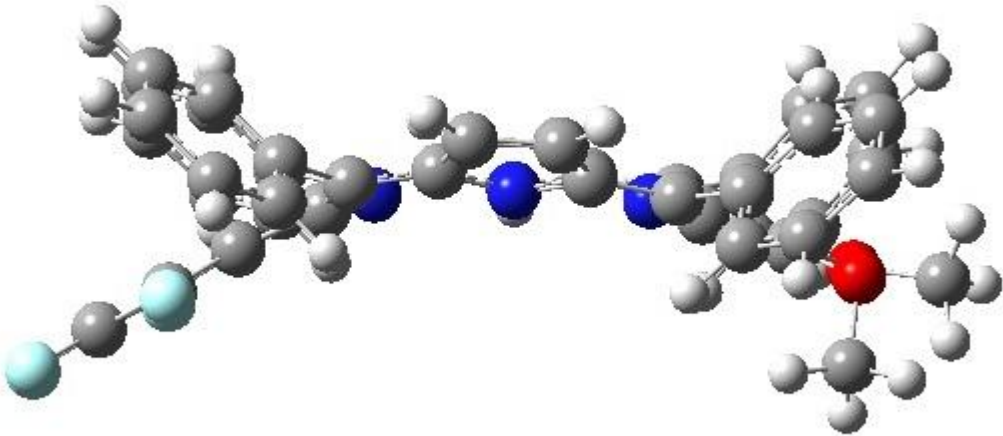

Supplement: c3ra40308d.pdf [file c3ra40308d.pdf]
